# Supplementary material for: Higher Potassium Intake and Lower Sodium Intake May Help in Reducing CVD Risk by Lowering Salt Sensitivity of Blood Pressure in the Han Chinese Population
Source: MDPI journal article supplement (doi:10.3390/nu14204436), 2022-10-21
Supplement: s1 [file s1]

Supplementary Table S1. Association of SSBP with 10-year CVDs risk by linear regression.

| SSBP                         | Univariate linear regression |         | * Multivariate linear regression |         |
|------------------------------|------------------------------|---------|----------------------------------|---------|
|                              | $\beta$ (95%CI)              | P value | $\beta$ (95%CI)                  | P value |
| Continuous                   |                              |         |                                  |         |
| MAP change 1, per SD         | 0.22(0.01, 0.43)             | 0.039   | 0.29(0.09, 0.49)                 | 0.005   |
| MAP change 2, per SD         | 0.13(-0.22, 0.48)            | 0.463   | 0.11(-0.19, 0.41)                | 0.467   |
| Categories                   |                              |         |                                  |         |
| MAP change 1, mmHg           |                              |         |                                  |         |
| quartiles 1 ( $\leq -4.29$ ) | Reference                    | -       | Reference                        |         |
| quartiles 2 (-4.30 to 0.49)  | 0.44(-0.60, 1.48)            | 0.405   | 0.31(-0.73, 1.35)                | 0.557   |
| quartiles 3 (0.50 to 4.99)   | 0.35(-0.18, 0.88)            | 0.190   | 0.20(-0.32, 0.72)                | 0.444   |
| quartiles 4 ( $\geq 5.00$ )  | 0.73(0.35, 1.12)             | <0.001  | 0.70(0.33, 1.08)                 | <0.001  |
| P for trend                  |                              | <0.001  |                                  |         |
| MAP change 2, mmHg           |                              |         |                                  |         |
| quartiles 1 ( $\leq -3.83$ ) | Reference                    | -       | Reference                        |         |
| quartiles 2 (-3.84 to 0.33)  | -1.69(-2.62, -0.72)          | 0.001   | -1.49(-2.40, -0.57)              | 0.001   |
| quartiles 3 (0.33 to 4.83)   | -0.54(-1.04, -0.04)          | 0.033   | -0.47(-0.93, -0.01)              | 0.048   |
| quartiles 4 ( $\geq 4.84$ )  | -0.24(-0.59, 0.10)           | 0.165   | -0.32(-0.65, 0.00)               | 0.053   |
| P for trend                  |                              | 0.318   |                                  | 0.128   |

\*Adjusted for 24hUNa/K.

Supplementary Table S2. Association between sodium, potassium, sodium: potassium ratio, and the 10-year CVDs risk by linear regression.

|                        | Univariate linear regression |         | * Multivariate linear regression |         |
|------------------------|------------------------------|---------|----------------------------------|---------|
|                        | $\beta$ (95%CI)              | P value | $\beta$ (95%CI)                  | P value |
| <b>Continuous</b>      |                              |         |                                  |         |
| 24hUNa, per SD (g/day) | 0.48(0.22, 0.75)             | <0.001  | 0.44(0.17, 0.71)                 | 0.001   |
| 24hUK, per SD (g/day)  | 0.35(-0.06, 0.77)            | 0.094   | 0.31(-0.11, 0.72)                | 0.146   |
| 24hUNa/K, per SD       | 0.79(0.34, 1.23)             | <0.001  | 0.82(0.38, 1.26)                 | <0.001  |
| <b>Categories</b>      |                              |         |                                  |         |
| <b>24hUNa (g/day)</b>  |                              |         |                                  |         |
| quartile 1             | Reference                    |         | Reference                        |         |
| quartile 2             | 2.40(1.28, 3.52)             | <0.001  | 2.31(1.20, 3.43)                 | <0.001  |
| quartile 3             | 1.24(0.68, 1.80)             | <0.001  | 1.22(0.66, 1.79)                 | <0.001  |
| quartile 4             | 1.13(0.75, 1.51)             | <0.001  | 1.09(0.71, 1.47)                 | <0.001  |
| P for trend            |                              | <0.001  |                                  | <0.001  |
| <b>24hUK (g/day)</b>   |                              |         |                                  |         |
| quartile 1             | Reference                    |         | Reference                        |         |
| quartile 2             | 1.37(0.18, 2.55)             | 0.024   | 1.29(0.11, 2.47)                 | 0.033   |
| quartile 3             | 0.28(-0.28, 0.84)            | 0.33    | 0.16(-0.40, 0.72)                | 0.573   |
| quartile 4             | 0.45(0.06, 0.84)             | 0.024   | 0.42(0.03, 0.81)                 | 0.034   |
| P for trend            |                              | 0.086   |                                  | 0.127   |
| <b>24hUNa/K</b>        |                              |         |                                  |         |
| quartile 1             | Reference                    |         | Reference                        |         |
| quartile 2             | 1.83(0.65, 3.01)             | 0.003   | 1.85(0.66, 3.03)                 | 0.002   |
| quartile 3             | 1.07(0.46, 1.68)             | 0.001   | 1.07(0.47, 1.68)                 | 0.001   |
| quartile 4             | 0.78(0.35, 1.20)             | <0.001  | 0.80(0.38, 1.23)                 | <0.001  |
| P for trend            |                              | <0.001  |                                  | <0.001  |

\*Adjusted for MAP change 1.

Supplementary Table S3. Association between sodium, potassium, sodium: potassium ratio, and SSBP stratified by hypertension

|                        | MAP change 1 (mm Hg)           |                |                                   |                | MAP change 2 (mm Hg)           |                |                                   |                |
|------------------------|--------------------------------|----------------|-----------------------------------|----------------|--------------------------------|----------------|-----------------------------------|----------------|
|                        | <sup>a</sup> With hypertension |                | <sup>a</sup> Without hypertension |                | <sup>a</sup> With hypertension |                | <sup>a</sup> Without hypertension |                |
|                        | $\beta$ (95%CI)                | <i>P</i> value | $\beta$ (95%CI)                   | <i>P</i> value | $\beta$ (95%CI)                | <i>P</i> value | $\beta$ (95%CI)                   | <i>P</i> value |
| <b>Continuous</b>      |                                |                |                                   |                |                                |                |                                   |                |
| 24hUNa (g/day), per SD | -0.240 (-0.512, 0.033)         | 0.085          | 0.082 (-0.205, 0.369)             | 0.576          | 0.010 (-0.237, 0.257)          | 0.937          | 0.325 (-0.341, 0.991)             | 0.338          |
| 24hUK (g/day), per SD  | -0.080 (-0.598, 0.439)         | 0.763          | -0.408 (-0.818, 0.001)            | 0.051          | 0.152 (-0.726, 1.030)          | 0.734          | 0.511 (-0.070, 1.091)             | 0.084          |
| 24hUNa/K, per SD       | 0.148 (-0.236, 0.531)          | 0.450          | 0.576 (0.006, 1.146)              | 0.048          | -0.018 (-0.980, 0.819)         | 0.860          | -0.296 (-1.183, 0.590)            | 0.512          |
| <b>Categories</b>      |                                |                |                                   |                |                                |                |                                   |                |
| <b>24hUNa (g/day)</b>  |                                |                |                                   |                |                                |                |                                   |                |
| quartile 1             | Ref.                           |                | Ref.                              |                | Ref.                           |                | Ref.                              |                |
| quartile 2             | -0.421 (-1.158, 0.316)         | 0.262          | 0.202 (-0.412, 0.316)             | 0.519          | -2.262 (-4.836, 0.313)         | 0.085          | -0.931 (-2.043, 0.181)            | 0.101          |
| quartile 3             | -0.207 (-0.852, 0.438)         | 0.528          | 0.399 (-1.635, -0.141)            | 0.153          | -0.675 (-1.901, 0.551)         | 0.280          | 0.482 (-0.529, 1.492)             | 0.350          |
| quartile 4             | -0.312 (-0.969, 0.344)         | 0.350          | 0.440 (-0.081, 0.961)             | 0.098          | -0.552 (-1.671, 0.568)         | 0.333          | 0.000 (-0.406, 0.405)             | 0.999          |
| P for trend            |                                | 0.350          |                                   | 0.098          |                                | 0.569          |                                   | 0.819          |
| <b>24hUK (g/day)</b>   |                                |                |                                   |                |                                |                |                                   |                |
| quartile 1             | Ref.                           |                | Ref.                              |                | Ref.                           |                | Ref.                              |                |
| quartile 2             | -0.140 (-1.638, 1.358)         | 0.854          | -0.858 (-2.022, 0.306)            | 0.148          | -1.323 (-3.725, 1.080)         | 0.280          | 0.583 (-0.543, 1.709)             | 0.310          |
| quartile 3             | -0.517 (-1.151, 0.117)         | 0.110          | -0.645 (-1.171, -0.118)           | 0.017          | -0.586 (-1.736, 0.564)         | 0.317          | 0.408 (-0.171, 0.987)             | 0.167          |
| quartile 4             | 0.070 (-0.416, 0.557)          | 0.777          | -0.276 (-0.696, 0.145)            | 0.198          | -0.094 (-1.136, 0.949)         | 0.860          | 0.537 (-0.164, 1.238)             | 0.133          |
| P for trend            |                                | 0.974          |                                   | 0.097          |                                | 0.855          |                                   | 0.066          |
| <b>24hUNa/K</b>        |                                |                |                                   |                |                                |                |                                   |                |
| quartile 1             | Ref.                           |                | Ref.                              |                | Ref.                           |                | Ref.                              |                |
| quartile 2             | -0.277 (-1.802, 1.249)         | 0.721          | 0.613 (-0.653, 1.880)             | 0.342          | 1.846 (0.238, 3.454)           | 0.025          | 0.887 (-1.233, 3.008)             | 0.412          |
| quartile 3             | -0.665 (-1.376, 0.047)         | 0.067          | 0.390 (-0.190, 0.970)             | 0.187          | 1.226 (-0.609, 3.061)          | 0.190          | -0.315 (-0.950, 0.320)            | 0.330          |
| quartile 4             | -0.186 (-0.726, 0.354)         | 0.449          | 0.524 (0.111, 0.937)              | 0.013          | 0.598 (-0.511, 1.707)          | 0.289          | -0.225 (-0.658, 0.208)            | 0.308          |
| P for trend            |                                | 0.251          |                                   | 0.005          |                                | 0.332          |                                   | 0.383          |

\*Adjusted for age, gender, BMI, FBG, and baseline MAP.
